# Supplementary material for: A Zebrafish Mutant in the Extracellular Matrix Protein Gene efemp1 as a Model for Spinal Osteoarthritis
Source: MDPI journal article supplement (doi:10.3390/ani14010074), 2023-12-24

Figure S1. No significant effect on bone mineralization in *efemp1*<sup>-/-</sup> mutants at 5 dpf compared to WT. (A) Ventral view of alizarin red stained WT and *efemp1*<sup>-/-</sup> larvae at 5 dpf. The blue arrowheads point to the skeletal elements: branchiostegal ray1 (br1), ceratohyal (ch), dentary (d), entopterygoid (en), hyomandibular (hm), maxillary (m), opercle (op) and parasphenoid (p). (B) Fraction (%) of individuals presenting a high (maroon), normal/intermediate (red), reduced/low (light red), or absent (white) level of bone mineralization in the different bone elements in WT and *efemp1*<sup>-/-</sup> fish at 5dpf. (WT n = 24, *efemp1*<sup>-/-</sup> n = 15).

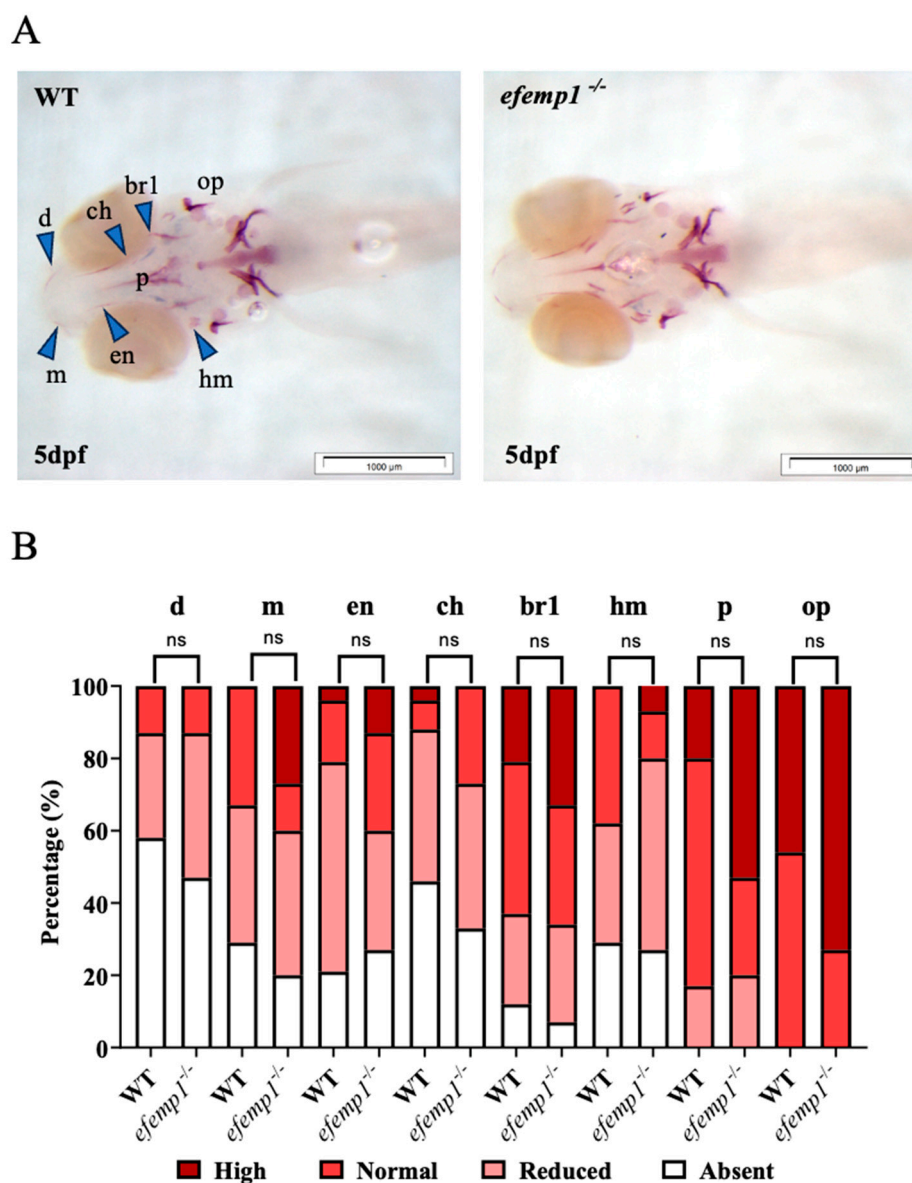

Supplement: s1 [file s1]
